# Supplementary material
Source: PubMed Central journal article supplement (PMC3562839)
Supplement: 1212375110_pnas.201212375SI.pdf [file 1212375110_pnas.201212375SI.pdf]

# Supporting Information

Gilbert and Levine 10.1073/pnas.1212375110

## SI Materials and Methods

**Model Structure.** Our study builds on a spatially explicit, discrete time patch occupancy model (Eq. 1). The model structure assumes that local population dynamics are fast relative to colonization dynamics, as seems reasonable for the focal ecosystem. It also assumes that metapopulation extinction only occurs when it is the deterministic outcome of the colonization and extinction dynamics. It does not predict stochastic global extinctions, as might be likely when metapopulation sizes are small.

Here, we provide a more detailed description of the metapopulation model. The model assumes that the change in the probability of occurrence ( $p$ ) of a focal species in a patch is the difference between the colonization probability ( $C$ ) and extinction probability ( $E$ ). As given in Eq. 1, the probability of colonization for patch  $i$  is:

$$C_i(p) = \frac{S_i(p)}{S_i(p) + \frac{1}{c}}, \text{ where } S_i(p) = \sum_{j \neq i} \mu A_j p_j K_{ij}, \quad [\text{S1A}]$$

and the probability of extinction is:

$$E_i(p) = e D_i (1 - C_i(p)), \text{ where } D_i = (1/\mu A_i). \quad [\text{S1B}]$$

The patch area is denoted  $A$ , and  $\mu$  represents the seed production of the focal species per unit area of patch. In annual plants, seed production is a measure of both local population size and the number of potential dispersers. The colonization probability (Eq. S1A) is a saturating function of the distance-weighted seed production in all other patches ( $S$ ) and has a value of 0.5 when the number of seeds ( $S$ ) equals  $1/c$ . The dispersal probability between patches ( $K_{ij}$ ) is developed further below. Extinction is inversely related to the population size in the focal patch Eq. S1B). The species-specific parameter  $e$  gives the probability that a small patch (supporting one individual, on average) would go locally extinct in the absence of a rescue effect. This rescue effect,  $[1 - C_i(p)]$ , reduces the chance of extinction.

The function  $g_i(p)$ , where

$$g_i(p) = C_i(p)/E_i(p), \quad [\text{S2}]$$

describes the expected frequency of colonization events relative to extinction events for each patch  $i$ . Building on the methods developed by Ovaskainen and Hanski (1), our model is what they characterize as a Levins-type model, with  $g_i(p) = c S_i(p)/e D_i$ . For these types of models, when evaluated at  $P = 0$ , the leading eigenvalue ( $\lambda$ ) of the Jacobian matrix of the function  $g$  [the mathematical matrix  $\mathbf{M}$  with elements  $\partial g_i(p)/\partial p_j$ ] defines the invasion capacity of the metapopulation (i.e., whether the metapopulation can grow from an initial low occupancy). The leading eigenvalue also defines the metapopulation capacity, the non-zero equilibrium for the metapopulation; it provides a very close approximation of the spatially weighted equilibrium site occupancy for the spatially realistic Levins model ( $p^* \approx 1 - 1/\lambda$ ) (1, 2). We use this relationship to arrive at Eq. 5.

Standard estimation techniques for determining metapopulation parameters assume that the metapopulation under study is in a quasiequilibrium state, meaning that the incidence (site occupancy) of a species reflects its colonization and extinction rates (3). However, when an extinction debt is present, the metapopulation does not have a nonzero quasiequilibrium by

definition. As a result, site occupancy cannot be used to infer colonization and extinction rates. Instead, the individual parameters of the model (Eq. 4) must be estimated experimentally. Our approach of evaluating the ratio of eigenvalues (Eq. 5) allows us to eliminate several parameters that do not change following invasion, thus minimizing the number of parameters that need to be estimated (Eq. S6B).

**Dispersal function.** The seed arrival function ( $S_i$  in Eqs. 1B and 3 and Eq. S1A) describes the number of seeds that are expected to arrive at site  $i$ . Based on the focal California system, we assume passive, isotropic dispersal. The size and distance of the “target patch” affect the number of arriving seeds as follows. The probability that each seed dispersing from patch  $j$  arrives in patch  $i$  is first determined by the probability  $[p(x)]$  of dispersing the distance interval  $d_{ij} \pm \text{radius}_i$  (Fig. S1). This defines a ring around the source patch, and the fraction of that ring that is occupied by the target patch  $i$ ,  $d_{ij}$  distance away, is equal to  $\sqrt{A_i}/(4d_{ij}\sqrt{\pi})$ . With a normal dispersal kernel, this geometric framework gives:

$$S_i = \mu k \sum_{j \neq i} A_j \frac{\sqrt{A_i}}{\sigma d_{ij}} \int_{d_{ij}-\text{radius}_i}^{d_{ij}+\text{radius}_i} \exp(-x^2/2\sigma^2). \quad [\text{S3}]$$

The constant  $k$ , which is equal to  $2^{-3/2}\pi^{-1}$ , normalizes the dispersal kernel and the target area approximation such that the total probability of dispersal to all possible locations is equal to 1.

We checked this approximation with simulations in which large numbers of seeds produced in a source patch dispersed following a normal dispersal kernel and the probability of arriving at other patches of varying size (radius) and at various distances away from the source patch was measured. These simulations showed that the approximation (Eq. S3) accurately describes the effect of target size and distance on seed arrival ( $R^2 = 0.998$ ) when the minimum distance between the closest edges of two patches is greater than the rms dispersal distance ( $\sigma$ ) and underestimates the probability of seed arrival when this distance is smaller than  $\sigma$ . With this rule, the proportion of pairwise site distances in our study system that are underestimated is 0.001.

Eq. S3 was then used to estimate the impact of reducing patch size on the dispersal between patches, including the fact that patches become effectively further apart. It should be noted that this “target area” effect is appropriate when invasive species have caused patch areas to shrink by encroaching on the edges of pre-invasion habitat area. In areas where patches have been invaded such that the area remains constant but native densities decline, only the per area seed production ( $\mu$ , Table S1) term changes.

Eq. S3 assumes that dispersal cannot proceed by spreading through the matrix over successive generations. To include this process, we first rewrite the equation such that it expresses the probability that a single seed disperses to the target patch:

$$P(\text{one seed arriving}) = k \frac{\sqrt{A_i}}{\sigma d_{ij}} \int \exp(-x^2/2\sigma^2), \quad [\text{S4A}]$$

where the integral is again defined by the interval  $d_{ij} \pm \text{radius}_i$ . Given that plants in our system can produce seeds in the matrix (but still have finite rates of increase less than 1), we developed a prediction for dispersal when a seed landing in the matrix could potentially produce other seeds. In particular, we modeled dispersal through the matrix as a random walk that allows the focal

seed or its offspring to disperse from habitat patch  $j$  to  $i$ . Each step in the walk, apart from the initial dispersal from patch  $j$ , is taken with probability  $R$  (the finite rate of increase or average number of offspring per seed in the matrix). The probability of a seed (or its offspring) dispersing from patch  $j$  to patch  $i$  in  $n$  generations is defined by its kernel,  $Q_n$ . The probability of the seed dispersing in the first generation (i.e., directly) is given in Eq. S4A. The probability of it arriving in the second generation is given by:

$$Q_2 = Rk \frac{\sqrt{A_i}}{\sqrt{2}\sigma d_{ij}} \int \left( \exp\left(-x^2/2(\sqrt{2}\sigma)^2\right) \right) dx (1 - Q_1). \quad \text{[S4B]}$$

The final term in Eq. S4B ( $1 - Q_1$ ) accounts for the fact that a seed cannot colonize a patch twice (i.e., the probability can never sum to more than 1). The  $\sqrt{2}$  that scales the rms dispersal distance ( $\sigma$ ) is a result of the random walk. The variance of a random walk is equal to  $n\sigma^2$ , where  $n$  is the number of steps taken and  $\sigma^2$  is the variance of the normal dispersal kernel. The integral remains unchanged from Eq. S4A because it measures the distance between patches. Following this random walk over several generations gives:

$$Q_3 = R^2 k \frac{\sqrt{A_i}}{\sqrt{3}\sigma d_{ij}} \int \left( \exp\left(-x^2/2(\sqrt{3}\sigma)^2\right) \right) dx (1 - Q_2) \dots$$

$$Q_n = R^{n-1} k \frac{1}{\sqrt{n}} \frac{\sqrt{A_i}}{\sigma d_{ij}} \int \left( \exp\left(-x^2/2(\sqrt{n}\sigma)^2\right) \right) dx (1 - Q_{n-1}). \quad \text{[S4C]}$$

The total probability of a seed, or its offspring, reaching patch  $i$  [i.e.,  $K_{ij}$ ] is the sum of these probabilities:

$$K_{ij} = \sum_{n=1}^{\infty} Q_n. \quad \text{[S5]}$$

$$m_{ij_{\text{post-inv}}}/m_{ij_{\text{post-inv}}} = \left(w'H_F\right)^2 \frac{\sum_{n=1}^{\infty} \left[ \frac{1}{\sqrt{n}} \left[R(R')\right]^{n-1} \int \left( \exp\left(-d_{ij}^2/2n\sigma^2\right) \right) dx (1 - Q_{n-1}) \right]}{\sum_{n=1}^{\infty} \left[ \frac{1}{\sqrt{n}} R^{n-1} \int \left( \exp\left(-d_{ij}^2/2n\sigma^2\right) \right) dx (1 - Q_{n-1}) \right]}, \quad \text{[S6B]}$$

The formulations given in Eqs. S4 and S5 are based on a model in which a seed and its offspring can only disperse between two patches. They also assume that the surviving progeny of any seed is only considered to disperse if the seed did not reach patch  $j$  (the  $1 - Q_{n-1}$  term in the final brackets in Eq. S4); this term eliminates multiple colonization events. In reality, and for areas with multiple "recipient" patches, this correction factor for multiple colonization events should include the probability of the seed establishing on any other patch, because a seed can only colonize a single patch (i.e.,  $1 - \sum Q_{n-1}$ , with the summation calculated over all sites). However, simulations indicate that this probability is low enough for sparsely distributed habitats (habitats occupying <12% of the region; our study site is ~5% of the region) that it has little effect on the probability of dispersal.

We checked the approximation of our dispersal model, including multigenerational spread through the matrix with simulations. As before, we assembled hypothetical landscapes with patches varying in distance from the source patch but now including multigenerational dispersal through the matrix with  $0 < R < 1$ . These simulations indicate that Eq. S5 provides a good

fit to dispersal probabilities even for landscapes with multiple patches, as long as those patches are sparsely distributed (all  $R^2$  values  $> 0.996$ ).

Although Eq. S5 should be calculated over an infinite number of generations, the low survival rates in the matrix between rocky outcrops (the  $R^{n-1}$  term) quickly reduces the probability of colonization to near zero after about 10 generations. For example, numerical analysis shows that even for relatively large sink populations with  $R = 0.33$  (i.e., one in three seeds, on average, produces a viable seed),  $R^{n-1} \approx 10^{-7}$  in 15 generations. The largest estimate of  $R$  in our study was for *Salvia* ( $R = 0.34$ ), and the lowest was for *Chaenactis* ( $R = 0.01$ ; Table S2).

We evaluate the effects of invasion on dispersal probabilities by multiplying the finite rate of increase rate in the matrix ( $R$ ) by  $R'$ , the finite rate of increase rate in the invaded matrix relative to that in the native bunchgrass (Eq. S6). All species but one had nonzero finite rates of increase when grown among exotic grasses; for these species,  $R'$  estimates ranged from one-half to 1/17 (Table S2). Invasion also modifies the area of patches, which reduces both  $A_i$  and the range of the integral evaluated in Eqs. S3–S5. These latter effects are shown in Fig. 3.

**Incorporating invasion into the model.** When we incorporate the effects of invasion on seed production, habitat area, and matrix permeability into our model, the elements of the metapopulation matrix become:

$$m_{ij} = \frac{ck\mu^2 A_i^{1.5} A_j}{e\sigma d_{ij}} \left(w'H_F\right)^2 \sqrt{H_F} \sum_{n=1}^{\infty} \left[ \frac{1}{\sqrt{n}} \left[R(R')\right]^{n-1} \int \left( \exp\left(-d_{ij}^2/2n\sigma^2\right) \right) dx (1 - Q_{n-1}) \right], \quad \text{[S6A]}$$

and

with  $w'$  defined as the ratio of seed density postinvasion to preinvasion. It depends on both the seed production in habitat lost to invaders and the fraction of habitat remaining ( $H_F$ ). In particular, if  $v$  is the ratio of seed production in habitat lost to invaders to seed production in refugia (Fig. 2 and Table S1),  $w' = \frac{1}{H_F(1-v)+v}$ . The effects of seed loss and reduced connectivity can be separated using Eq. S6B, with the effect of lost seed production (on colonization and extinction) given by the term  $(w'H_F)^2$  and the remainder of the equation giving the loss in connectivity due to reduced target area (patch size) and reduced matrix permeability. Changes to seed production act as a scalar, such that  $\lambda_{\text{postinvasion}} = \lambda_{\text{preinvasion}} (w'H_F)^2$  in the absence of a change in connectivity. Unlike seed production, connectivity depends on the geographic positions of refugia relative to each other, and changes in connectivity therefore do not scale  $\lambda$  in a uniform manner. The complete list of parameters included in our model and how they are parameterized is given in Table S3.

**Model assumptions.** To estimate the effects of invasion in this landscape, three important assumptions about the population dynamics of the species were needed. The first assumption is that extinction probability in a patch scales inversely with local pop-

ulation size (Eq. 1C and Eq. S1B). This assumption follows Hanski's model of local extinction (3, 4), where extinction  $\propto 1/A^x$ . A small value of  $x$  corresponds to a high level of environmental stochasticity; in our study system, species' finite rates of increase had coefficients of variation that ranged from 0.36 to 1 when measured over 3 y (5), indicating a high level of variability consistent with  $x \approx 1$ , as was used in our model. Increasing the value of  $x$  increases the sensitivity of the metapopulation to habitat loss, and our estimates here are therefore conservative in terms of the impacts of habitat loss.

The second assumption is related to the consistency of population growth rates over time. Although the model allows for fluctuating population growth rates through time, we assume that the (geometric) mean population growth rate on refugia has not changed from that before invasion. Similarly, we assume that the mean ratio of population growth rates on refugia to those in the invaded portion of habitat patches stays constant over time.

The third assumption is in the dispersal approximation, which assumes that seed dispersal is represented well by a normal dispersal kernel (Eq. S4). This shape of kernel can be derived from first principles and is appropriate for many plant species (6). However, a "fat-tailed" distribution may be more appropriate for some species. The random walk that we used to model matrix permeability (Eq. S4) tends to a normal distribution of dispersal distances over many generations, even when a different kernel describes seed dispersal in a single generation (6). The normal distribution is numerically tractable for this reason, whereas other kernels are not. Although we are not able to find a numerical solution for fat-tailed distributions, a sensitivity analysis with the exponential dispersal kernel (a fatter tailed kernel) indicates that the results of Eq. S4 are more sensitive to mean dispersal distance than to the shape of the kernel, especially for refugia that are relatively close together (and therefore contribute more strongly to  $\lambda$ ). Similarly, a sensitivity analysis showed that a change in the mean dispersal distance of a normal kernel (as used here) causes a larger change in metapopulation viability ( $\lambda$ ) than changing the shape of the dispersal kernel [sensitivity tested using fatter tailed distributions – the exponential distribution and the  $t$ -distribution with 3 df (7), all scaled to an equal mean dispersal distance]. Because of this greater sensitivity to mean dispersal distance, our use of a high dispersal distance ( $\sigma = 1$ ) likely underestimates the impacts of changing connectivity on metapopulation persistence. To provide a range of realistic predictions, we also consider a dispersal distance within the expected range of the focal species ( $\sigma = 0.5$ ; Figs. S2 and S3).

**Model Simulations and Numerical Solutions.** We used numerical solutions of the model to determine the loss of metapopulation viability following invasion and how this loss is partitioned between connectivity effects and seed production effects (Fig. 3, Fig. S4, and Eq. S6B). Our estimates of extinction thresholds for each species (Eq. 5 and Fig. 4A) and the effects of invasion on dispersal rates (Eqs. S4 and S5 and Fig. 2C) are also based on numerical solutions.

Simulation modeling was used for two purposes. First, as described in the section on the dispersal model, we used simulations to test our analytical approximations of the dispersal function (e.g., Eqs. S3–S5). Second, we used simulations to generate time lines to extinction (Fig. 4B and Fig. S5). Although our model does predict the conditions under which extinction debts will occur (Eq. 5), simulations are needed to give expected time lines for extinction. For all such simulations, we used the metapopulation modeling approach outlined by Hanski (8), in which all refugia are modeled as distinct, circular patches surrounded by matrix habitat. This approach is different from one in which the matrix is divided into a lattice of patches of suboptimal quality; our dispersal kernel (Eqs. S4 and S5) accounts for the matrix habitat without requiring this step. The extinction time line simulations were run as follows.

We created a grid of plant densities (values of  $\mu$ ) by habitat loss scenarios. In total, we used 22 values of  $\mu$  and 11 habitat loss values ( $H_F$  ranging from 1 to 0.5) for 242 scenarios. For all parameters (Table S3), we used the average value from all species in our experiment (Table S5 and additional parameters for simulation, as explained below), except for average seeds per unit area ( $\mu$ ). Given all the parameters (except  $\mu$ ), we first solved Eq. S6B for the ratio of  $\lambda$  preinvasion vs. postinvasion. This ratio can then be used in Eq. 5 to determine the critical  $p^*$  value at which an extinction debt would emerge. Because the leading eigenvalue of the mathematical matrix  $\mathbf{M}$  has a known relationship with  $\mu$  ( $\lambda \propto \mu^2$ ; seen from the scalar  $\mu^2$  in  $\mathbf{M}$  in Eq. S6A), we were then able to select a range of values for  $\mu$  to generate a range of  $p^*$  values below this critical value.

For each value of  $\mu$  and  $H_F$ , we solved the metapopulation model for the expected occupancies of each patch before invasion. In particular, in accordance with the study by Ovaskainen and Hanski (1) (equations 3 and 4 in ref. 1), we define  $h(p)$  as a function such that  $h_i(p) = g_i(p)/(1 + g_i(p))$ . We then iteratively solved for  $p$  using the equation  $p_{i+1} = h(p_i)$  employing an initial value for  $p$  ( $p_0$ ) that was uniformly low in all patches. The solution to the iteration gave the expected occupancy of each patch before invasion [full details are provided in the study by Ovaskainen and Hanski (1)].

We then created 150 "preinvasion landscapes" for each combination of habitat loss and plant density. These landscapes were spatially identical to the current postinvasion landscape (Fig. 1B), except that the area of each patch  $i$  was equal to its preinvasion size,  $A_i/H_F$ . In each of these 150 landscapes, the initial occupancy of each patch was random (determined by a Bernoulli trial) with a probability equal to the expected occupancy before invasion (Eq. S6A with  $w' = 1$ ,  $H_F = 1$ , and  $R' = 1$ ); the initial occupancy was therefore a vector of values of 0 and 1, with each element corresponding to a patch. We then began the simulation of colonization and extinction dynamics of each patch following Eq. 1, with the vector  $p$  replaced by the vector of initial occupancies and using the vital rates and patch area of the postinvasion metapopulation; in other words, this was the onset of invasion in our simulations. Changes in occupancy for each patch (from occupied to empty or vice versa) were determined using Bernoulli trials with the probability given by Eq. 1A. We ran these simulations until the metapopulation went extinct or persisted for more than 2,000 generations. In Fig. 4B and Fig. S5, we report the time until all patches went extinct as the median time across the 150 simulations for a given combination of habitat loss and mean seed density.

**Additional Parameters for Simulating Time to Extinction.** The parameters  $c$  and  $e$  (Eq. 1 and Eq. S6A) are not necessary for determining the change in metapopulation viability (Eq. S6B), but they are necessary for simulating time to extinction when an extinction debt is present (Fig. 4B). We do not have direct estimates for these parameters, but reasonable estimates are available from our data, and we explored the effects of uncertainty in parameter estimation. Our estimates are based on scaling from our field-based results on individual seed success; these results give an indication of the number of seeds required to colonize successfully (informing our estimate of  $c$ ) and the likelihood that a small number of seeds will go extinct without producing more offspring (i.e., the parameter  $e$ ). Our estimates were generated as follows.

Let the seed germination rate be  $g$ , the survival rate of ungerminated seeds be  $s_u$ , the survival rate from germinated seed to plant be  $s_p$ , and the seed production of surviving plants be Poisson-distributed with mean  $m$ . The probability that a single seed will produce zero seeds in one generation is  $g(1-s_p) + (1-g)(1-s_u) + e^{-m}$ ; the probability that it will produce one seed is  $(1-g)s_u + me^{-m}$ ; the probability of producing  $n$  seeds, where  $n > 1$ , is the Poisson probability of  $n$  seeds multiplied by  $gs_p$ . Assuming no intraspecific density effects at the earliest stages of population growth, these probabilities can be used for multiple seeds while treating each

seed as independent; the total number of seeds in generation 2 is then equal to the sum produced by the individual seeds from generation 1. Our experiments provided direct measurements of  $g$ ,  $s_p$ , and  $s_u$ . We combined these estimates from all species, giving mean values of  $g = 0.16$ ,  $s_p = 0.44$ , and  $s_u = 0.24$  (Table S5). In addition, we could solve numerically for  $m$  by assuming positive population growth rates, where the expected finite rate of increase  $E(R)$  is:

$$E(R) = mgs_p + (1 - g)s_u. \quad [S7]$$

The parameter  $1/c$  defines the half-saturation point of the colonization probability, meaning that when  $1/c$  seeds arrive in a patch, there is a 50% chance of colonization. We ran simulations to determine the number of seeds required to reach a colonization probability of 0.5, where colonization was scored as a “fail” if the population reached zero and as a success if it reached 100 (again, assuming density independence in all cases). We found that for all finite rates of increase  $>2.2$ , which occurred with  $m > 29$ , this probability converged at the maximum  $1/c = 7.85$ . The estimate of  $c = 0.127$  is therefore the maximum estimate possible with our data. At finite rates of increase below 2.2, the parameter  $c$  varied from 0.031 [ $E(R) = 1.1$ ] to 0.111 [ $E(R) = 2.2$ ].

The parameter  $e$  gives the probability that a population with a size of one will go extinct. For annual plants, we defined this as the probability that a population of size one would go extinct without producing a new viable seed (i.e., we assume that a seed that has survived in the seed bank cannot disperse to another patch but that its offspring can). The probability that at least one new seed will be produced is:

$$p(x \geq 1) = gs_p(1 - e^{-1}) \sum_{i=0}^{\infty} \{(1 - g)s_u\}^i = \frac{gs_p(1 - e^{-1})}{1 - s_u(1 - g)}. \quad [S8]$$

The parameter  $e$  is equal to  $1 - \text{Eq. S8}$ , which is 0.944 for our data. The estimates for  $c$  and  $e$  that we used were based on an “average species,” meaning that we averaged the germination and survival rates for all species. Because these estimates could presumably alter the time lines of an extinction debt (Fig. 4B), we reran these simulations with each parameter  $\pm 0.1$  but with maximum  $e$  set at 1 (i.e., the largest symmetrical differences possible while maintaining parameters within the bounds of 0–1). These simulations were used to determine the sensitivity of extinction time lines to the parameters  $c$  and  $e$  (Fig. S5). In some cases, this caused the extinction probability to be greater than 1 in some patches (i.e., in patches with  $\mu * A_i < 1$ ); in such case, we used the convention that  $E_i = \min(1, E_i)$  (1, 3).

**Focal Species and Habitat.** We selected seven native annual species that occur on refugia and that are abundant enough to provide sufficient seed for our experiments: *Chaenactis galibriuscula*, *Chorizanthe palmerii*, *Lasthenia californica*, *Lotus wrangelianus*, *Micropus californicus*, *Plantago erecta*, and *Salvia columberiae*. We conducted field-based experiments and sampling in an area of ~8 ha at the northern edge of the Sedgwick Reserve (34° 44' 20" North, 120° 01' 34" West) in Santa Barbara County, California. The area has a natural metapopulation structure, with refugia of annual native plants occurring on slightly raised mounds with coarse soils (9). The area between refugia is almost completely covered with exotic grasses, mainly *Avena fatua*, *Avena barbata*, and *Bromus* sp. Pockets of native bunchgrasses (mainly *Stipa pulchra*, *Stipa lepida*, and *Stipa cernua*) persist in small patches among these invasive grasses.

To develop the spatial metapopulation model, we surveyed refugia locations and areas within a 5.1-ha area of our study site (Sedgwick Reserve). This area, demarcated by a road on one side and natural boundaries (i.e., stream, different habitat types) on

other sides, contained a total of 118 refugia. Refugia varied in size from 0.1 to 181 m<sup>2</sup> and covered a total of 5.5% of the surveyed area. Refugia were identified either through the presence of indicator native annual plants or as areas without native annuals but with similar characteristics (open, coarse-grained soils) and lacking dense invasive grasses. For model simplification, we calculated the centers and area of refugia and modeled them as circles on the landscape.

**Field Experiments. Habitat quality experiment.** Exotic grass invasion makes it difficult to determine the degree to which native species once performed in now invaded areas. Therefore, seed production rates in different portions of the landscape were estimated using an exotic grass competitor removal experiment, with 20 × 20-cm plots placed on refugia and at small distances from the refugia edge in the matrix. In all plots, all competitors were initially removed and the same density of native annual seed (3 g species<sup>-1</sup>·m<sup>-2</sup>) was sown. These densities were higher than those that are typically observed on refugia (5) to ensure that plants were in a competitive environment. All habitat quality plots were paired, with one plot used to estimate seed production and the other used to measure germination and seedling survival (to maturity) rates. A total of 96 plots were established.

Seed production for each pair of plots was estimated as the number of viable seeds produced, plus  $s_u(1 - g)$ , where  $g$  is the germination fraction and  $s_u$  is the survival rate of ungerminated seeds (5). The survival of ungerminated seeds ( $s_u$ ) was estimated by testing their viability before and after a year of burial in nylon mesh bags (5). All seed production values were divided by mean seed production on refugia to give the ratio of the finite rates of increase in invaded areas relative to those on refugia (parameter  $\nu$ ).

Significant differences in seed production between locations (i.e., refugia vs. matrix) were first tested using a nested distance-based permutation multivariate ANOVA (MANOVA) (10). Following a significant result, the ratio of seed production between habitats was tested for each species using generalized least squares (gls), which accounted for heterogeneous variances and the nested observations at each refugia. The gls results were confirmed by testing the number of viable seeds produced in each habitat using a generalized linear mixed model with a quasi-Poisson distribution and determining the ratio from the output of that model. These two approaches produced nearly identical results, and we therefore only report the results of the gls analyses. These and all other analyses were performed using R (11).

In each of the refugia that were used to conduct the habitat quality experiment, we also collected data from two 0.25-m<sup>2</sup> control quadrats (i.e., undisturbed quadrats). We calculated species richness in these combined quadrats, including our focal species and five other common refugia species. We calculated the area of each of these refugia and tested the correlation between refugia size and species richness per 0.5 m<sup>2</sup> to determine if larger refugia contained more species per unit area (Fig. S2), as predicted by theory (12).

**Matrix permeability experiment.** We estimated our focal species' finite rates of increase in the matrix ( $R$ ) before and after invasion by sowing seeds into remnant native bunch grass locations and exotic annual grass locations. We first located remnant patches of native bunchgrass and placed paired plots in native bunchgrasses and in adjacent (<1.5-m distant) patches of invasive grass. Exotic grasses were weeded from between bunchgrass clumps and counted, and the same number of exotic grass stems was weeded at random from patches of invasive grasses.

Two plots were placed in each type of grass: full-density seeding, using the seed densities from natural refugia, and low-density seeding, with the latter used to determine if population growth rates differ when only small amounts of seed are present. These two treatments represent situations in which many or a few native seeds land among grasses. Finite rates of increase in low- and high-density plots did not differ significantly ( $P > 0.05$  for all species), indicating

that species mainly experienced competition from surrounding grasses; thus, these estimates were combined for analysis. Finite rates of increase were determined as viable seeds produced/viable seeds added. These estimates assume that ungerminated seeds do not contribute to population growth, which is appropriate when seed germination is consistently close to zero, as was the case among the grasses. Because seeds in native bunchgrass plots were only sown between clumps, finite rates of increase in these plots were scaled by the proportion of each plot that was not occupied by bunchgrass bases (where native annuals cannot establish). A nested distance-based permutation MANOVA (10) was first used to test for significant differences between bunchgrass and exotic grasses. Following a significant result, individual tests were performed for each species with generalized linear mixed models using penalized quasilielihood and a quasi-Poisson distribution.

**Seed dispersal estimates.** Seed dispersal rates were first estimated from well-established relationships between dispersal distances, plant height, and dispersal syndrome (13), and they were then validated. According to these relationships, mean dispersal distances for our species range from 0.1 to 0.5 m, with the lower estimate for the shortest plant with no dispersal mechanism and the higher estimate for the tallest of the wind-dispersed plants. When approximated using a normal (Gaussian) dispersal kernel, these dispersal distances correspond to rms dispersal distances ( $\sigma$ ) of 0.25 to 0.63 m. We used two empirical methods to test the validity of these seed dispersal estimates. We created “false refugia” in 2008 by clearing circular, 50-m<sup>2</sup> areas of invasive grasses. These false refugia were placed across the study area, with nearest edges ranging from 0.5 to 7 m from the nearest refugia. Germinants of our focal species were counted in 2009, with this number likely overestimating colonization because it included any extant seed bank. In addition, in 2009, we chose two

refugia that contained all species and placed seed traps (28 × 52 cm, 92 total seed traps) at up to 8 m from the refugia, with more traps placed at greater distances to account for the change in total area. Seed trap data could not be attained for *Lasthenia* due to small seed size or for *Lotus* because congeneric species made identification unreliable; for these taxa, we were restricted to using colonization rates on false refugia.

Very low colonization rates of false refugia and an almost complete lack of seed dispersal into seed traps (Table S4) indicate that our species were as dispersal-limited as predicted from relationships established in the literature. For example, *Plantago* is one of the most abundant species on refugia, with ~730 seeds per square meter. Only two *Plantago* plants were found on the 11 false refugia placed on the landscape, even though these false refugia each had an area of 50 m<sup>2</sup> and were placed from 0.5 to 7 m from occupied refugia. *Plantago* had a greater colonization rate than four other species on the false refugia and a lower rate than two species (Table S4). Likewise, a total of 10 seeds were found in seed traps between 0 and 2 m from the refugia edge; when correcting for area sampled, ~2.5% of *Plantago* seeds disperse between 0.1 m and 2 m from the patch edge. Compared with the dispersal of a plant with an rms dispersal distance of 1 m, *Plantago* had about one-sixth the proportion of seeds expected. Because metapopulation models are sensitive to assumptions about dispersal, we chose to use this large estimate of seed dispersal (i.e.,  $\sigma = 1$  m) in all the tests presented in the main text to represent the most conservative scenario for the development of an extinction debt. We also generate estimates assuming an rms dispersal distances ( $\sigma$ ) of 0.5 m to generate a range of estimates (Figs. S2 and S3). We chose to alter mean dispersal distances instead of the shape of the kernel both for logistical reasons and because the model was more sensitive to mean distance (*Model assumptions*).

- Ovaskainen O, Hanski I (2001) Spatially structured metapopulation models: Global and local assessment of metapopulation capacity. *Theor Popul Biol* 60(4):281–302.
- Hanski I, Ovaskainen O (2000) The metapopulation capacity of a fragmented landscape. *Nature* 404(6779):755–758.
- Hanski I (1994) A practical model of metapopulation dynamics. *J Anim Ecol* 63(1):151–162.
- Hanski I (1994) Patch-occupancy dynamics in fragmented landscapes. *Trends Ecol Evol* 9(4):131–135.
- Levine JM, HilleRisLambers J (2009) The importance of niches for the maintenance of species diversity. *Nature* 461(7261):254–257.
- Turchin P (1998) *Quantitative Analysis of Movement: Measuring and Modeling Population Redistribution in Animals and Plants* (Sinauer Associates, Sunderland, MA).
- Muller-Landau HC, Wright SJ, Calderón O, Condit R (2008) Interspecific variation in primary seed dispersal in a tropical forest. *J Ecol* 96(4):653–667.
- Hanski I (1998) Metapopulation dynamics. *Nature* 396(6706):41–49.
- Gram WK, et al. (2004) Distribution of plants in a California serpentine grassland: Are rocky hummocks spatial refuges for native species? *Plant Ecol* 172(2):159–171.
- McArdle B, Anderson M (2001) Fitting multivariate models to community data: A comment on distance-based redundancy analysis. *Ecology* 82(1):290–297.
- R Development Core Team (2011) *R: A Language and Environment for Statistical Computing* (R Foundation for Statistical Computing, Vienna).
- Holt RD (1993) *Species Diversity in Ecological Communities*, eds Ricklefs RE, Schluter D (Univ of Chicago Press, Chicago), pp 77–88.
- Thomson FJ, Moles AT, Auld TD, Kingsford RT (2011) Seed dispersal distance is more strongly correlated with plant height than with seed mass. *J Ecol* 99(6):1299–1307.









**Table S1. Relative finite rates of increase in refugia and invaded areas at the edge of refugia**

| Species                             | Relative finite rate of increase |                          | Invaded/refugia |
|-------------------------------------|----------------------------------|--------------------------|-----------------|
|                                     | Refugia                          | Invaded area             |                 |
| <i>Chaenactis glabriuscula</i> (Cg) | 0.96 (0.07)                      | 1.05 (0.09)              | 1 <sup>†</sup>  |
| <i>Chorizanthe palmerii</i> (Cp)    | 1.09 (0.37)                      | 2.27 (0.44)**            | 2.10            |
| <i>Lasthenia californica</i> (Lc)   | 1.17 (0.15)                      | 1.83 (0.18)***           | 1.57            |
| <i>Lotus wrangelianus</i> (Lw)      | 1.00 (0.20)                      | 1.48 (0.26) <sup>†</sup> | 1.47            |
| <i>Micropus californicus</i> (Mc)   | 1.03 (0.20)                      | 1.70 (0.24)**            | 1.65            |
| <i>Plantago erecta</i> (Pe)         | 0.92 (0.40)                      | 3.39 (0.62)***           | 3.68            |
| <i>Salvia columbariae</i> (Sc)      | 0.98 (0.39)                      | 3.64 (0.46)***           | 3.70            |

<sup>†</sup> $P < 0.1$ ; \* $P < 0.05$ ; \*\* $P < 0.01$ , \*\*\* $P < 0.001$ ; tests if value is significantly different in refugia.

<sup>†</sup>Set to 1 because of nonsignificant difference between refugia and invaded areas. These data were incorporated into Eqs. 4 and S6 through the relative quality of the refugia before and after invasion,  $w'$ .  $w' = \frac{1}{H_f(1-v)+v}$  where  $H_f$  is the fraction of patch habitat eliminated by invasion and  $v$  is the finite rate of increase in invaded areas/refugia (fourth column in table).

**Table S2. Finite rates of increase in matrix areas among native bunchgrasses and exotic grasses**

| Species                             | Finite rate of increase ( $R$ ) among* |               |                   |               | $P$             |
|-------------------------------------|----------------------------------------|---------------|-------------------|---------------|-----------------|
|                                     | Exotic grasses                         |               | Native bunchgrass |               |                 |
| <i>Chaenactis glabriuscula</i> (Cg) | 0.00                                   |               | 0.01              | (0.004–0.030) | NA <sup>†</sup> |
| <i>Chorizanthe palmerii</i> (Cp)    | 0.01                                   | (0.006–0.021) | 0.14              | (0.113–0.180) | 0.003           |
| <i>Lasthenia californica</i> (Lc)   | 0.02                                   | (0.011–0.026) | 0.28              | (0.199–0.399) | <0.001          |
| <i>Lotus wrangelianus</i> (Lw)      | 0.04                                   | (0.019–0.070) | 0.08              | (0.043–0.135) | 0.279           |
| <i>Micropus californicus</i> (Mc)   | 0.002                                  | (0.001–0.003) | 0.02              | (0.012–0.036) | 0.002           |
| <i>Plantago erecta</i> (Pe)         | 0.06                                   | (0.027–0.113) | 0.25              | (0.187–0.342) | 0.062           |
| <i>Salvia columbariae</i> (Sc)      | 0.07                                   | (0.042–0.133) | 0.34              | (0.254–0.448) | 0.029           |

Values in parentheses give the mean  $\pm$  SE.  $P$  values are from species-specific generalized linear mixed models using penalized quasilielihood and a quasi-Poisson distribution to test if the two grass types differed significantly.

\*Estimates for each grass type (exotic vs. native) were used in model predictions for all species (Figs. 2C and 3 and Figs. S2 and S3).

<sup>†</sup>Could not be tested because *Chaenactis* did not produce seeds when grown in exotic grass patches.

**Table S3. Parameters included in model and sources for parameter estimates**

| Parameter                         | Explanation                                                                                                                                                                                                                                                                                                                        | Source of estimate                                                                                                                                                                                                                                                                                                                                                                                                     |
|-----------------------------------|------------------------------------------------------------------------------------------------------------------------------------------------------------------------------------------------------------------------------------------------------------------------------------------------------------------------------------|------------------------------------------------------------------------------------------------------------------------------------------------------------------------------------------------------------------------------------------------------------------------------------------------------------------------------------------------------------------------------------------------------------------------|
| Models S5 and S6B                 |                                                                                                                                                                                                                                                                                                                                    |                                                                                                                                                                                                                                                                                                                                                                                                                        |
| $w'$                              | Model S5: matrix permeability<br>Model S6B: change in metapopulation viability<br>Ratio of seed density postinvasion to preinvasion; determined from the habitat fraction ( $H_F$ ) and the ratio of finite rates of increase on habitat lost to invaders and habitat remaining postinvasion ( $v$ ; see explanation for Eq. S6B). | Habitat quality experiment. Results for $v$ are given in Fig. 2A and Table S1.                                                                                                                                                                                                                                                                                                                                         |
| $H_F$                             | Fraction of native annual habitat remaining after invasion                                                                                                                                                                                                                                                                         | This parameter is not empirically estimated. We calculate all impacts over an $H_F$ ranging from 1 (no habitat loss) to 0.5 (50% habitat loss).                                                                                                                                                                                                                                                                        |
| $R$                               | Native annual population growth rate in matrix among native bunchgrasses                                                                                                                                                                                                                                                           | Matrix permeability experiment. Results are given in Fig. 2B and Table S2.                                                                                                                                                                                                                                                                                                                                             |
| $R'$                              | Native annual population growth rate in matrix among exotic grasses                                                                                                                                                                                                                                                                | Matrix permeability experiment. Results are given in Fig. 2B and Table S2.                                                                                                                                                                                                                                                                                                                                             |
| $\sigma$                          | Rms dispersal distance                                                                                                                                                                                                                                                                                                             | Dispersal estimated from published sources and two sampling experiments. Due to uncertainty in this parameter, all impacts were calculated for estimated dispersal distances and greater dispersal distances ( $\sigma = 0.5$ m in Fig. S3 and $\sigma = 1$ in Fig. 3, respectively). Results in all main figures were produced with the larger dispersal distance to generate a conservative impact of fragmentation. |
| Simulation of times to extinction |                                                                                                                                                                                                                                                                                                                                    |                                                                                                                                                                                                                                                                                                                                                                                                                        |
| $c$                               | These simulations required the parameters listed above, plus the following<br>Determines the rate at which the probability of colonization increases as more seeds arrive. In particular, the number of seeds required for a 50% probability of colonization is $1/c$ .                                                            | Estimated with data from the habitat quality experiment ( <i>SI Materials and Methods, Additional Parameters for Simulating Time to Extinction</i> ). Because this estimate may vary from year to year, and our uncertainty in its component vital rates, we reran simulations with $c$ ranging symmetrically around this estimate.                                                                                    |
| $e$                               | Per-individual extinction rate                                                                                                                                                                                                                                                                                                     | Estimated with data from the habitat quality experiment. ( <i>SI Materials and Methods, Additional Parameters for Simulating Time to Extinction</i> ). Because this estimate may vary from year to year, and our uncertainty in its component vital rates, we reran simulations with $e$ ranging symmetrically around this estimate.                                                                                   |
| $\mu$                             | Average density of the focal species (individuals $m^{-2}$ ) within patches                                                                                                                                                                                                                                                        | This parameter was varied in simulations ( $y$ axis on left for Fig. 4 and Fig. S4) to assess the sensitivity of extinction to mean local abundance.                                                                                                                                                                                                                                                                   |

**Table S4. Seed dispersal results from seed traps and false refugia**

| Species                             | No. of seeds in traps<br><2 m from refugia edge* | Density (seeds m <sup>-2</sup> )<br>on nearby refugia, $\mu^{\dagger}$ | Total no. of "false<br>refugia" colonized <sup>‡</sup> |
|-------------------------------------|--------------------------------------------------|------------------------------------------------------------------------|--------------------------------------------------------|
| <i>Chaenactis glabriuscula</i> (Cg) | 0                                                | 343                                                                    | 0                                                      |
| <i>Chorizanthe palmerii</i> (Cp)    | 0                                                | 431                                                                    | 1                                                      |
| <i>Lasthenia californica</i> (Lc)   | —                                                | 6,290                                                                  | 7                                                      |
| <i>Lotus wrangelianus</i> (Lw)      | —                                                | 137                                                                    | 6                                                      |
| <i>Micropus californicus</i> (Mc)   | 0                                                | 218                                                                    | 0                                                      |
| <i>Plantago erecta</i> (Pe)         | 10                                               | 704                                                                    | 2                                                      |
| <i>Salvia columbariae</i> (Sc)      | 0                                                | 878                                                                    | 0                                                      |

\*Fifty-five seed traps for a total coverage of ~7.5 m<sup>2</sup>. Traps were placed to be more numerous at larger distances such that ~13% of the total area between 0 and 2 m from refugia was covered with seed traps. Species marked "—" had seeds that were too small to reliably find (Lc) or had multiple congeners with similar seeds (Lw).

<sup>†</sup>Estimates of density were obtained from the habitat quality experiment.

<sup>‡</sup>Eleven false refugia were created by clearing 50 m<sup>2</sup> of invasive grasses at 11 locations ranging in distance from 0.5 to 7 m from the nearest refugia.

**Table S5. Parameter estimates for each species studied**

| Species                             | Ungerminated<br>seed survival, $s_u$ | Seed<br>germination, $g$ | Germinant survival<br>to reproduction, $s_p$ |
|-------------------------------------|--------------------------------------|--------------------------|----------------------------------------------|
| <i>Chaenactis glabriuscula</i> (Cg) | 0.12                                 | 0.14                     | 0.15                                         |
| <i>Chorizanthe palmerii</i> (Cp)    | 0.15                                 | 0.15                     | 0.37                                         |
| <i>Lasthenia californica</i> (Lc)   | 0.20                                 | 0.12                     | 0.50                                         |
| <i>Lotus wrangelianus</i> (Lw)      | 0.13                                 | 0.04                     | 0.08                                         |
| <i>Micropus californicus</i> (Mc)   | 0.09                                 | 0.04                     | 0.50                                         |
| <i>Plantago erecta</i> (Pe)         | 0.66                                 | 0.36                     | 0.50                                         |
| <i>Salvia columbariae</i> (Sc)      | 0.34                                 | 0.29                     | 0.49                                         |

Two parameters ( $s_u$  and  $g$ ) were used to determine the finite rate of increase of species in refugia and invaded areas (Fig. 2A), and the average of these rates across species were used in simulations of times to extinction (Fig. 4 and Fig. S4). These, along with germinant survival to reproduction,  $s_p$ , were also used to estimate  $c$  and  $e$  for simulations of times to extinction (*SI Materials and Methods, Additional Parameters for Simulating Time to Extinction*). Estimates for parameters  $g$  and  $s_p$  were obtained from the habitat quality experiment, whereas the estimate for  $s_u$  was obtained from seeds that were buried in mesh bags over one growing season.
